# Supplementary material
Source: publisher site journal article supplement (https://www.dovepress.com/get_supplementary_file.php?f=490289.docx)
Supplement: Supplementary file 1 [file get_supplementary_file.php]

eTable1 COA tools that submitted to FDA with Letters of Intent accepted but not yet qualified

| ID | Disease/Condition | DDT COA Number and Instrument Name | Concept of Interest | Context of Use | COA Type |
| --- | --- | --- | --- | --- | --- |
| 1 | Chronic Heart Failure (CHF) | DDT COA #000112: Chronic Heart Failure- Symptom Scale (CHF-SS) | CHF symptoms | Patients with CHF | PRO |
| 2 | Chronic Heart Failure (CHF) | DDT COA #000113: Chronic Heart Failure- Impact Scale (CHF-IS) | CHF symptom impacts | Patients with CHF | PRO |
| 3 | Chronic Heart Failure (CHF) | DDT COA #000114: Chronic Heart Failure- Activity Monitor-Based Endpoint Measure | Daily physical activity | Patients with CHF | DHT- Passive Monitoring COA |
| 4 | Chronic Kidney Disease (CKD) | DDT COA #000095: PROMIS Pediatric Chronic Kidney Disease Short Form- Fatigue | Fatigue | Children (8-17 years) with CKD | PRO |
| 5 | Chronic Kidney Disease (CKD) | DDT COA #000119: PROMIS Pediatric Chronic Kidney Disease Short Form- Sleep Disturbance | Sleep Disturbance | Children (8-17 years) with CKD | PRO |
| 6 | Hip fracture | DDT COA #000037: Short Physical Performance Battery (SPPB) | Lower-extremity functional decline | Adult patients (>65 years) who have diminished muscle mass, muscle strength and decreased function as a result of hip fracture | PerfO |
| 7 | Sarcopenia | DDT COA #000085: PROMIS® Physical Functioning in Sarcopenia | Physical functioning | Patients with sarcopenia | PRO |
| 8 | Sarcopenia | DDT COA #000105: Actibelt® in Sarcopenia | Change in real-world walking speed | Patients with sarcopenia in recovery after surgical treatment of hip fracture | DHT- Passive Monitoring COA |
| 9 | Sickle Cell Disease (SCD) | DDT COA #000057: Sickle Cell Pain Diary | Pain intensity and pain interference | Pediatric patients with SCD | PRO |
| 10 | Obesity | DDT COA #000036: Impact of Weight on Quality of Life- Lite (IWQOL-Lite) Clinical Trials Version | Weight-related quality of life concepts | Adult patients with obesity and no weight-related comorbidities and Adult patients who are overweight or obese with >1 weight-related comorbidity | PRO |
| 11 | Alzheimer’s Disease | DDT COA #000004: PerfO to assess instrumental activities of daily living (IADLs) | Day to day functioning | Adults (>45 years) with mild cognitive impairment due to Alzheimer’s Disease | PerfO |
| 12 | Duchenne Muscular Dystrophy (DMD) | DDT COA #000103: ActiMyo® | Daily motor activity | Children, adolescent, and adult patients (> 5 years old) with DMD | DHT- Passive Monitoring COA |
| 13 | Duchenne Muscular Dystrophy (DMD) | DDT COA #000104: Duchenne Video Assessment | Quality of movement | Ambulatory patients > 4 years old with DMD | ClinRO |
| 14 | Dystrophinopathy | DDT COA #000032: Abilities Captured through Interactive Video Evaluation (ACTIVE)-seated | Functional reaching volume (FRV) intended to encompass upper extremity and trunk movement | Children (>4-12 years) and adolescents (12-17 years) and adults with Duchenne muscular dystrophy (DMD) or Becker muscular dystrophy (BMD) | PerfO |
| 15 | Multiple Sclerosis (MS) | DDT COA #000069: Fatigue PRO in Multiple Sclerosis | Physical functioning | Patients with MS | PRO |
| 16 | Multiple Sclerosis (MS) | DDT COA #000106: Actibelt® in MS | Change in real-world walking speed | Patients with MS | DHT- Passive Monitoring COA |
| 17 | Multiple Sclerosis (MS) | DDT COA #000123: Physical Function PRO in Multiple Sclerosis | Physical functioning | Patients with MS | PRO |
| 18 | Major Depressive Disorder (MDD) | DDT COA #000108: Symptoms of Major Depressive Disorder Diary (SMDDD) | Depression symptom severity | Adults with MDD with a 24-hour recall period | PRO |
| 19 | Major Depressive Disorder (MDD) | DDT COA #000109: Symptoms of Major Depressive Disorder Momentary Assessment (SMDDMA) | Depression symptom severity | Adults with MDD “at this moment” | PRO |
| 20 | Schizophrenia | DDT COA #000107: Virtual Reality Functional Capacity Assessment Tool (VRFCAT) | Functional capacity | Patients with schizophrenia | PerfO |
| 21 | Schizophrenia | DDT COA #000115: EPICOG-SCH | Cognitive impairment | Patients with schizophrenia | PerfO |
| 22 | Alcohol use disorder (AUD) | DDT COA #000110: WHO Risk Drinking Levels of Alcohol Consumption | WHO 2-level risk drinking reduction | Patients diagnosed with an AUD | PRO |
| 23 | Musculoskeletal pain | DDT COA #000102: Physical Activity Accelerometry Assessment for Analgesic Clinical Trials (PAACT) | Physical activity | Non-cognitively impaired adults with a diagnosis of osteoarthritis of the knee | DHT- Passive Monitoring COA |
| 24 | Opioid Use Disorder (OUD) | DDT COA #000138: Opioid Craving PRO | Changes in opioid craving | Patients with mild to severe OUD | PRO |
| 25 | Pain | DDT COA #000073: QUALIfied for Therapeutic Evaluations of Pain (QUALITE-Pain) | Pain intensity | Non-cognitively impaired adults with acute and chronic pain | PRO |
| 26 | Chronic Fatigue Syndrome (CFS) Myalgic Encephalomyelitis (ME) Systemic Exertion Intolerance Disease (SEID) | DDT COA #000080: PROMIS® Fatigue for ME/CFS/SEID | Fatigue | Patients with CFS, ME, or SEID | PRO |
| 27 | Systemic Lupus Erythematosus (SLE) | DDT COA #000135: Cutaneous Lupus Erythematosus Disease Area and Severity Index (CLASI) in Systemic Lupus Erythematosus (SLE) | Presence and severity of signs of cutaneous manifestations | Patients with SLE | ClinRO |
| 28 | Asthma | DDT COA #000099: Child Asthma Diary (CAD) | Symptom severity | Children (4-11 years) with a clinical diagnosis of mild to severe persistent asthma requiring a daily long-term control medication | PRO/ObsRO |
| 29 | Idiopathic pulmonary fibrosis (IPF) | DDT COA #000027: A Tool to Assess Quality of Life in Idiopathic Pulmonary Fibrosis (ATAQ-IPF) | Symptom experience, daily functioning and other health-related quality of life impacts | Adult patients (>18 years) with IPF | PRO |
| 30 | Crohn’s disease (CD) | DDT COA #000034: Crohn’s Disease Patient-Reported Outcomes Signs and Symptoms (CD-PRO/SS) | Signs and symptoms of CD | Adult patients (>18 years) with moderate to severe clinically active CD treated in the outpatient setting | PRO |
| 31 | Crohn’s disease (CD) | DDT COA #000049: Pediatric Inflammatory Crohn’s MRE Index (PICMI) | Disease activity | Children (5-17 years) with CD | ClinRO |
| 32 | Crohn’s disease (CD) | DDT COA #000076: TUMMY-CD | Signs and symptoms of CD | Pediatric patients with CD | PRO |
| 33 | Crohn’s disease (CD) | DDT COA #000092: PROMIS® Pediatric Crohn’s Disease Short Form - Fatigue 10 | Fatigue (frequency, duration and intensity) | Children (8-17 years) with CD | PRO |
| 34 | Eosinophilic Esophagitis (EoE) | DDT COA #000024: Pediatric Eosinophilic Esophagitis (EoE) Symptom Severity Module (PEESS™ v2.0) | EoE Symptoms | Children (2-12 years) and adolescents (12-18 years) with EoE | ObsRO |
| 35 | Functional dyspepsia (FD) | DDT COA #000013: Functional Dyspepsia Symptom Diary (FDSD) | FD symptom severity | Adult patients that have met Rome III diagnostic criteria for FD | PRO |
| 36 | Gastroparesis | DDT COA #000020: The American Neurogastroenterology and Motility Society Gastroparesis Cardinal Symptom Index Daily Diary (ANMS GCSI-DD) | Gastroparesis symptoms | Adult patients (>18 years) with idiopathic or diabetic gastroparesis | PRO |
| 37 | Irritable Bowel Syndrome | DDT COA #000148: Diary for Irritable Bowel Syndrome Symptoms- Diarrhea (DIBSS-D) | Symptom Severity | Adults who meet Rome diagnostic criteria (Rome III or IV) and have active symptoms | PRO |
| 38 | Irritable Bowel Syndrome | DDT COA #000151: Diary for Irritable Bowel Syndrome Symptoms- Mixed (DIBSS-M) | Symptom Severity | Adults who meet Rome diagnostic criteria (Rome III or IV) for IBS-M and have active symptoms | PRO |
| 39 | Polycystic Liver Disease (PLD) | DDT COA #000075: Polycystic Liver Disease Questionnaire (PLD-Q) | PLD symptoms | Adult patients with Gigot stage II or III PLD | PRO |
| 40 | Alopecia areata (AA) | DDT COA #000101: Patient-Reported Symptoms and Impacts of Alopecia Areata | Concepts related to hair loss and regrowth deemed important by patients with AA | Adult patients (> 18 years) with AA with at least > 25% hair loss on scalp and current episode of hair loss lasting at least 6 months | PRO |
| 41 | Atopic dermatitis | DDT COA #000120: Scratch Sensor | Itch intensity and persistence | Patients > 2 years with atopic dermatitis | DHT- Passive Monitoring COA |
| 42 | Cutaneous Lupus Erythematosus (CLE) | DDT COA #000130: Cutaneous Lupus Erythematosus Disease Area and Severity Index (CLASI) in Cutaneous Lupus Erythematosus (CLE) | Presence and severity of signs of CLE | Patients with CLE | ClinRO |
| 43 | Hidradenitis suppurativa (HS) | DDT COA #000111: Hidradenitis Suppurativa Quality of Life (HiSQOL) | Symptom severity, limitations in performance of activities, and psychosocial effects | Adult patients with HS | PRO |
| 44 | Hidradenitis suppurativa (HS) | DDT COA #000118: Hidradenitis Suppurativa Area and Severity Index (HASI) | Disease severity and extent of active (inflamed) HS | Adult patients with HS | ClinRO |
| 45 | Acute Bacterial Skin and Skin Structure Infection | DDT COA #000019: Skin Infection Patient-Reported Outcome Measure (SKINFECT-PRO) | ABSSSI symptoms | Adult patients (> 18 years) with ABSSSI | PRO |
| 46 | Acute otitis media (AOM) | DDT COA #000083: Acute Otitis Media Severity of Symptoms Scale (AOM-SOS) | AOM symptoms | Children with AOM | ObsRO |
| 47 | Community-Acquired Bacterial Pneumonia (CABP) | DDT COA #000018: Pneumonia Patient-Reported Outcome Measure (PNEUMO-PRO) for the measurement of CABP symptoms | CABP symptoms | Adult patients (> 18 years) with CABP | PRO |
| 48 | Hospital-acquired Bacterial Pneumonia (HABP) | DDT COA #000071: Pneumonia Patient-Reported Outcome Measure (PNEUMO-PRO) for the measurement of HABP symptoms | HABP symptoms | Adult patients (> 18 years) with HABP | PRO |
| 49 | Non-Cystic Fibrosis Bronchiectasis (NCFBE) | DDT COA #000128: Symptom Assessment for Bronchiectasis (SABRE) | Disease related symptoms | Adult patients (>21 years) with NCFBE with or without non-tuberculous mycobacterial (NTM) infection | PRO |
| 50 | Plexiform neurofibroma (PN) | DDT COA #000061: Plexiform Neurofibroma Impact in Children & Adults | Tumor-related pain intensity, pain interference, and physical functioning | Children(>5 years) and adults with neurofibromatosis type 1 (NF1) and PN | PRO |
| 51 | Renal cell carcinoma (RCC) | DDT COA #000117: Network/Function Assessment of Cancer Therapy- Disease Related Symptom Scale (NFKSI-DRS) | Disease-related symptoms of RCC | Adult patients (>18 years) with advanced or metastatic (AJCC stage IV) RCC | PRO |
| 52 | Small cell lung cancer (SCLC) | DDT COA #000133: Small Cell Lung Cancer PRO | SCLC symptom severity | Adult patients adults (>18 years) with clinician-confirmed diagnosis of limited or extensive stage SCLC with Eastern Cooperative Oncology Group performance status of 0 to 2, regardless of the lines of therapy being administered | PRO |
| 53 | Retinitis Pigmentosa (RP) | DDT COA #000126: Functional Vision Questionnaire (FVQ) PRO | Visual function and functional vision | Adolescents (12-17 years) and adults (>18 years) with a clinical and genetic confirmed diagnosis of RP | PRO |
| 54 | Retinitis Pigmentosa (RP) | DDT COA #000127: Functional Vision Questionnaire (FVQ) ObsRO | Visual function and functional vision | Pediatric (3-11 years) patients with a clinical and genetic confirmed diagnosis of RP | ObsRO |

COA: Clinical Outcome Assessment
